# Supplementary material for: Effects of different proportions of stevia stalk on nutrient utilization and rumen fermentation in ruminal fluid derived from sheep
Source: PeerJ. 2023 Jan 25;11:e14689. doi: 10.7717/peerj.14689 (PMC9884030; doi:10.7717/peerj.14689)
Supplement: Supplemental Information 1 [file peerj-11-14689-s001.xlsx]

## Sheet: Gas production date
GP	2h	6h	12h	24h	36h	48h
0	15.51	17.51	120.408	168.367	186.735	197.755
0	10.2	17.46	106.122	169.388	200	200
0	12.87	17.56	113.28	168.367	168.367	182.653
0					198.98	187.755
0.002	12.22	22.059	98.8798	156.823	180.244	187.373
0.002	23.4216	18.009	102.851	155.804	189.409	190.224
0.002	17.82	20.05	100.88	156	176.171	182.281
0.002					175.153	182.281
0.002					168.024
0.4%	22.561	22.508	111.89	154.472	189.024	195.122
0.4%	27.439	19.508	107.724	145.325	173.984	188.008
0.4%	25	21.01	109.82	149.9	168.902	184.959
0.4%					186.992	202.236
0.4%					161.585	183.943
0.6%	26.3692	19.507	102.434	152.13	182.556	171.4
0.6%	16.1866	22.557	115.619	170.385	178.499	192.698
0.6%	14.1988	21.05	108.95	161.26	170.385	184.787
0.6%					183.57	186.41
0.6%					170.385	198.783
0.6%					166.937	174.848
0.008	30.3644	35.506	101.215	174.089	199.595	221.862
0.008	31.9838	36.006	117.409	145.749	179.15	188.259
0.008	31.17	35.76	109.31	159.92	209.717	227.935
0.008					216.599	228.745
0.01	32.3232	30.005	109.091	152.525	186.667	226.667
0.01	30.303	33.505	115.23	166.667	183.838	225.253
0.01	31.31	31.76	112.16	159.6	208.081	229.495
0.015	30.1829	31.4027	112.407	166.124	203.298	221.396
0.015	32.1537	30.5027	110.58	150.23	205.912	205.108
0.015	31.18	30.95	110.01	158.19	164.89	155.842
0.015					205.108	229.238
0.015					164.89	187.01

## Sheet: Ammonia nitrogen date
NH3-N	2h	6h	12h	24h	48h
0	19.5871	12.7732	11.5894	26.04	39.1916
0	20.5688	19.6449	12.7443	25.6215	37.69
0	20.08	16.22	12.18	26.4588	36.1888
0.002	18.2301	20.2512	16.3924	24.5243	44.2731
0.002	23.6293	18.49	18.6632	23.3406	36.1311
0.002	20.93	19.37	17.54	23.93	31.4249
0.004	18.8942	21.8681	11.8204	23.0807	33.8213
0.004	14.5056	12.7155	16.5844	21.1174	28.8552
0.004	16.7	17.31	14.2	22.1	32.1178
0.004					35.6691
0.004					34.1389
0.006	15.2562	19.6449	20.8286	23.3983	35.7846
0.006	21.8392	11.243	20.5688	24.89	35.8135
0.006	16.8154	15.44	20.7	26.35	31.0495
0.006					35.5248
0.008	20.1646	23.7736	30.4432	42.8873	39.5554
0.008	17.7104	30.5587	32.3777	45.3992	37.631
0.008	18.95	27.18	31.41	44.16	38.0944
0.008					40.3263
0.008					37.9775
0.008					38.4106
0.01	21.5216	30.5587	37.8057	46.4386	46.928
0.01	23.4272	18.49	34.12	45.4	42.8382
0.01	22.49	24.54	35.98	45.92	40.4028
0.015	25.506	30.5587	31.3094	40.9239	44.4161
0.015	14.5922	25.1306	29.64	43.85	41.2401
0.015	20.05	27.86	30.49	42.4	39.3244
0.015					46.0329
0.015					47.3509

## Sheet: pH date
								Ph	2h	6h	12h	24h	48h
1-5		1-1		1-3		1-8-2		0	6.96	7.23	6.87	6.53	6.71
1-13		1-2		1-11		1-8-3		0	6.99	7.26	6.83	6.55	6.27
2-5		2-4		2-8		1-9		0	6.99	7.26	6.85	6.81	6.71
2-8-14		2-6		2-14		2-3		0					6.21
3-8-10		3-1		3-7		2-12		0.002	6.95	7.25	6.89	6.85	6.25
3-8-11		3-8		3-9		3-2		0.002	6.91	7.22	6.87	6.81	6.71
4-8-13		4-1		4-6		3-11		0.002	6.93	7.25	6.88	6.83	6.61
4-12		4-7		4-8		4-9		0.002					6.76
4-13		5-2		5-5		4-11		0.002					6.73
5-7		5-13		5-6		5-8		0.002					6.23
5-11		6-7		6-9		5-9		0.004	6.9	7.17	6.88	6.82	6.75
6-1		6-10		7-1		6-3		0.004	6.96	7.25	6.85	6.85	6.71
6-4		7-7				6-8		0.004	6.93	7.21	6.88	6.85	6.75
7-2		7-11				7-14	6.51	0.004					6.72
7-10								0.004					6.72
								0.006	6.92	7.18	6.91	6.84	6.74
								0.006	7.2	7.19	6.85	6.75	6.69
								0.006	7.22	7.2	6.88	6.81	6.76
								0.006					6.74
								0.006					6.35
								0.006					6.77
								0.008	6.91	6.81	6.55	6.57	6.34
								0.008	6.89	6.85	6.58	6.62	6.18
								0.008	6.9	6.83	6.58	6.61	6.27
								0.008					6.2
								0.008					6.26
								0.008					6.21
								0.01	6.88	6.78	6.62	6.59	6.29
								0.01	6.89	6.84	6.62	6.52	6.15
								0.01	6.9	6.81	6.62	6.57	6.19
								0.015	6.91	6.84	6.6	6.51	6.28
								0.015	6.92	6.82	6.6	6.53	6.3
								0.015	6.93	6.83	6.6	6.52	6.32
								0.015					6.21
								0.015					6.32

## Sheet: Volatile fatty acid date
2h	acetic acid	propionic acid	Isobutyric acid	butyrate	Isovaleric acid	Valeric acid	Total acid
0	12.3811	5.96047	0.471642	1.96009	0.550117	0.558788	21.8822
0	12.1622	6.38903	0.492259	1.90743	0.499187	0.549521	21.9996
0	12.27	6.1	0.48	1.94	0.53	0.56	21.88
0.002	11.1241	5.365	0.465027	1.99081	0.591012	0.512652	20.0486
0.002	12.9088	5.20433	0.493796	2.77007	0.520447	0.90977	22.8072
0.002	12.03	5	0.49	2.53	0.54	0.7	21.29
0.004	16.3895	14.2567	0.514555	3.31998	0.537596	1.03356	36.052
0.004	16.0364	13.4777	0.504561	3.15095	0.530093	0.989531	34.6892
0.004	16.23	13.57	0.5	3.24	0.54	1.01	35.09
0.006	12.4221		0.481662	2.75689	0.500887	0.876112
0.006	10.7283	5.14649	0.476757	1.82996	0.486394	0.528531	19.1964
0.006	11.1147	5.97162	0.474974	1.80187	0.471317	0.51239	20.3469
0.008	15.6585	9.3789	0.494222	3.00298	0.511155	0.96416	30.0099
0.008	15.7612	8.19328	0.503288	3.12579	0.515632	0.976669	29.0759
0.008	15.71	7.8	0.5	3.08	0.52	0.97	28.58
0.01	17.9071	10.5404	0.540208	3.88498	0.551336	1.13333	34.5574
0.01	17.9452	13.1465	0.491199	3.1207	0.508065	0.940477	36.1521
0.01	18.43	11.66	0.53	3.2	0.53	1.07	35.42
0.015	15.6504	10.4732	0.505445	3.17245	0.518922	1.01305	31.3335
0.015	15.1553	8.1781	0.493445	2.98854	0.387564	0.966884	28.1699
0.015	15.42	9.37	0.5	3.16	0.44	0.99	29.88
6h	acetic acid	propionic acid	Isobutyric acid	butyrate	Isovaleric acid	Valeric acid	Total acid
0	18.3768	5.19881	0.40086	2.21231	0.51079	0.6687	27.3683
0	18.0244	5.23184	0.405219	2.14938	0.524171	0.639999	26.975
0	18.2	5.22	0.41	2.2	0.52	0.66	27.21
0.002	13.7152	7.10715	0.512694	2.08894	0.508142	0.646445	24.5785
0.002	13.2265	6.88639	0.483922	1.98511	0.440879	0.607575	23.6303
0.002	13.49	6.35	0.5	2.07	0.5	0.64	23.55
0.004	14.3267	5.16608	0.484201	2.02072	0.481518	0.632582	23.1118
0.004	13.2091	5.1725	0.483744	1.98101	0.495128	0.625878	21.9674
0.004	13.47	5.2	0.48	2	0.49	0.62	22.26
0.006	12.5269	5.19861	0.489531	1.99268	0.496571	0.614051	21.3184
0.006	11.496	5.17505	0.492678	2.04808	0.490688	0.630857	20.3333
0.006	12.03	5.19	0.49	2.05	0.5	0.62	20.88
0.008	22.4811	14.9683	0.546102	3.40471	0.577376	1.18822	43.1658
0.008	24.4305	22.9461	0.621699	4.46163	0.651354	1.5047	54.6159
0.008	23.47	20.46	0.59	4.23	0.63	1.3	50.68
0.01	24.0895	5.94326	0.565577	3.82494	0.59561	1.26654	36.2854
0.01	25.1501	5.24119	0.547118	3.59333	0.572486	1.23475	36.339
0.01	24.62	5.44	0.56	3.71	0.59	1.25	36.17
0.015	19.2995	5.19939	0.535208	3.21744	0.563557	1.12698	29.9421
0.015	20.1715	5.21949	0.556133	3.69169	0.599051	1.22148	31.4593
0.015	19.75	5.51	0.55	3.5	0.58	1.19	31.08
12h	acetic acid	propionic acid	Isobutyric acid	butyrate	Isovaleric acid	Valeric acid	Total acid
0	18.8837	6.87	0.523744	2.8929	0.549787	1	30.7202
0	18.7282	7.41134	0.55686	3.11523	0.566915	1.05584	31.4344
0	18.82	7.56	0.55	3.05	0.56	1	31.54
0.002	17.6234	8.42363	0.514643	2.78483	0.524386	0.92337	30.7943
0.002	18.0858	8.79032	0.532457	2.92884	0.538062	0.961861	31.8374
0.002	17.87	8.62	0.52	2.8	0.53	0.94	31.28
0.004	18.5378	9.43145	0.561639	3.22456	0.592079	1.04739	33.3949
0.004	18.4876	9.3452	0.54872	3.02459	0.55245	1.04655	33.0051
0.004	18.53	9.35	0.55	3.12	0.56	1.05	33.16
0.006	20.1444	5.13448	0.410608	2.82575	0.52295	0.900066	29.9382
0.006	19.9852	5.12455	0.54242	3.16452	0.54351	0.91546	30.2757
0.006	20.08	5.15	0.48	3	0.53	0.94	30.18
0.008	30.9137	16.1431	0.602598	4.52181	0.783398	1.56415	54.5288
0.008	28.6804	22.1328	0.624441	4.63699	0.721717	1.50881	58.3051
0.008	29.81	17.65	0.6	4.6	0.77	1.52	54.95
0.01	27.018	24.9798	0.746934	5.44394	0.859898	1.91816	60.9668
0.01	25.5245	23.4245	0.61856	5.4256	0.81546	1.5439	57.3526
0.01	26.27	24.21	0.68	5.44	0.8	1.7	59.1
0.015	20.3472	14.5933	0.53821	3.35965	0.592994	1.21742	40.6488
0.015	21.2455	18.8458	0.53935	3.4246	0.56349	1.23548	45.8542
0.015	19.3	16.54	0.54	3.54	0.58	1.2	41.7
24h	acetic acid	propionic acid	Isobutyric acid	butyrate	Isovaleric acid	Valeric acid	Total acid
0	19.0364	5.19523	0.724833	3.57644	1.1282	2.23538	31.8965
0	14.3326	5.13975	0.653814	3.40335	0.65079	1.22939	25.4097
0	16.7	5.17	0.69	3.45	0.85	1.75	28.61
0.002	22.6973	5.20101	0.401101	3.93686	0.625086	1.39515	34.2565
0.002	23.5436	5.2434	0.52	4.0434	0.61543	1.32454	35.2904
0.002	20.12	5.22	0.48	3.9	0.63	1.35	31.7
0.004	24.5945	5.2496	0.574023	4.28862	0.482968	1.52755	36.7173
0.004	21.4345	5.21554	0.57356	4.23156	0.63428	1.54395	33.6334
0.004	24.51	5.25	0.57	4.26	0.58	1.54	36.71
0.006	30.0755	11.2341	0.652925	5.09129	0.73456	1.81532	49.6037
0.006	26.9496	10.0135	0.582511	4.28771	0.642281	1.70823	44.1839
0.006	28.53	13.62	0.6	4.73	0.7	1.78	49.96
0.008	20.7	18.1953	0.714977	4.34953	0.983185	1.66049	46.6035
0.008	21.5423	17.6468	0.71645	4.34248	1.0846	1.6754	47.008
0.008	20.07	17.9	0.72	4.35	1.03	1.68	45.75
0.01	25.4324	21.5922	0.729808	4.71433	1.02504	1.77991	55.2737
0.01	23.4555	19.2665	0.71358	4.4565	1.02154	1.75256	50.6662
0.01	24.43	20.4	0.72	4.6	1.03	1.77	52.95
0.015	21.3063	17.4324	0.64342	4.01878	0.854364	1.54335	45.7986
0.015	22.6364	18.4458	0.65434	4.33864	0.9545	1.54232	48.572
0.015	21.54	18.09	0.65	4.2	0.9	1.54	46.92
48h	acetic acid	propionic acid	Isobutyric acid	butyrate	Isovaleric acid	Valeric acid	Total acid
0%			1.17738		1.60552	2.42627
0%	25.5183	11.0408		4.6575	0.878198	2.76613	44.861
0%	26.9827	11.2117	0.657049	4.87701	1.18724	1.86944	46.7851
0%	21.0311	24.9631	0.628336	4.56491	0.689653	3.62851	55.5056
0%			0.650962	4.58266	0.863897	1.83512
0.2%	12.2159	7.03002	0.496695	2.83378	0.574323	1.76455	24.9152
0.2%	9.95556			1.74236		0.471335
0.2%	24.2709	10.5055	0.624336	4.33113	0.451613	1.60577	41.7893
0.2%	9.10547		0.545125	1.72495	0.851253	0.468796
0.4%	19.3617	9.65592	0.391364	4.26246	0.787238	1.66865	36.1274
0.4%	20.1075	9.35542	0.604867	4.15802	1.0442	1.54698	36.8169
0.4%	15.385	8.19383	0.583128	3.66649	0.829077	1.41944	30.0769
0.4%	37.9959	12.5687	0.714071	4.8301	0.99749	1.70024	58.8066
0.4%	28.9286	12.4282	0.736735	4.95051	0.900451	1.76108	49.7055
0.6%	15.1612	7.67883	0.606872	3.59483	0.963979	1.30425	29.31
0.6%	18.5928	9.68697	0.64699	4.34751	0.779949	1.64462	35.6988
0.6%	16.89		0.63	4
0.8%	28.9364	20.0659	0.836462	4.94958	1.60568	2.04007	58.434
0.8%	27.0256	19.9004	0.838487	5.15556	2.07918	2.14323	57.1425
0.8%	26.5	20.15			1.8
1%	30.5135	20.5694	0.834971	5.20372	1.43859	2.19259	60.7527
1%	30.5116	23.1238	0.872986	5.44886	1.61476	2.23337	63.8053
1%	35.1109	23.2265	0.819834	5.28662	1.74988	2.19259	68.3864
1%						2.00967
1%	30.294	22.8695	0.909066	5.33407		2.09954	61.5061
0.015	18.2774	16.2659	0.784331	4.4079	1.40865	1.80382	42.948
0.015	23.2458	21.6396	0.896661	5.33844	1.4977	2.04312	54.6614
0.015	25.28	18.97	0.84	4.83	1.46	1.9	53.28

## Sheet: ADFD and NDFD date
处理	样重	NDF	ADF	NDFD	ADFD				NDFD	2h	6h	12h	24h	48h		ADFD	2h	6h	12h	24h	48h
A-1	0.0974	0.779261	0.240246	38.8022	26.5236				0	36.95	40.96	62.02	65.04	57.95		0	26.54	37.24	57.81	57.28	49.25
A-2	0.1703	0.73576	0.286553	31.9268	28.6202				0	39.31	43.52	64.32	61.85	59.05		0	24.69	36.86	56.93	56.34	48.3
A-3	0.1663	0.676488	0.240529	39.2986	22.5562				0	40.14	41.22	63.35	62.65	57.09		0	28.33	36.75	58.36	56.21	47.56
A-5	0.1714	0.677363	0.236873	34.2334	33.4426				0.002	32.51	39.65	60.35	57.89	56.04		0.002	29.15	36.53	58.31	70.36	46.54
A-6	0.1958	0.724719	0.284474	24.4409	21.2164				0.002	30.26	38.25	59.21	56.38	51.36		0.002	27.65	35.72	58.09	69.67	45.88
A-7	0.1875	0.711467	0.289067	31.3079	28.4646				0.002	33.02	37.6	55.58	59.22	49.92		0.002	29.06	36.86	58.11	70.3	44.77
B-4	0.1015	0.728079	0.251232	42.7895	36.1776				0.004	40.01	35.68	68.69	60.95	56.34		0.004	23.96	36.54	60.85	59.3	46.11
B-5	0.1304	0.728528	0.266871	46.1858	42.9508				0.004	36.95	36.13	69.26	59.99	54.65		0.004	22.56	35.97	61.37	58.49	45.37
B-6	0.1582	0.755373	0.273072	36.3685	38.8967				0.004	40.94	37.03	70.58	61.88	56.8		0.004	21.07	36.6	60.75	61.58	44.87
C-2	0.0955	0.802094	0.299476	58.3846	58.1667				0.006	29.96	40.69	73.08	69.29	60.14		0.006	25.69	36.26	67.24	58.47	60.07
C-3	0.059	0.957627	0.342373	69.5144	60.9909				0.006	30.21	43.35	70.65	69.87	57.31		0.006	23.86	37.19	66.91	59.38	58.76
C-4	0.0465	0.808602	0.225806	71.0675	66.0743				0.006	30.13	44.33	69.48	70.09	57.3		0.006	23.44	35.09	64.06	54.2	58.74
D-1	0.1455	0.846048	0.352577	63.1826	56.6094				0.008	33.65	45.46	68.12	56.68	75.31		0.008	33.54	43.35	68.25	67.11	67.58
D-2	0.0453	0.900662	0.300221	57.8341	70.1073				0.008	34.53	46.12	65.38	49.31	69.52		0.008	32.84	42.83	67.86	68.82	68.43
D-3	0.0864	0.837963	0.324074	60.9353	59.7894				0.008	34.51	46.99	65.04	58.41	68.56		0.008	33.94	42.67	68.49	64.23	66.01
D-7	0.0451	0.920177	0.292683	68.6303	68.5781				0.01	25.63	39.65	65.45	60.39	74.61		0.01	23.67	40.26	65.48	73.21	54.61
E-1	0.0837	0.923789	0.431138	58.0309	48.3745				0.01	25.96	37.03	64.21	61.52	71.23		0.01	21.23	37.51	63.97	73.33	52.83
E-2	0.1188	0.891834	0.427412	52.4394	45.7292				0.01	21.73	32.43	59.49	58.3	73.7		0.01	18.76	38.93	66.6	70.3	50.84
E-3	0.0901	0.906584	0.421579	55.9263	45.4511				0.015	31.25	47.59	73.52	69.25	73.69		0.015	27.64	49.27	67.29	68.61	67.49
E-4	0.0371	0.900326	0.42302	58.2535	59.1856				0.015	30.48	43.53	72.26	61.54	70.58		0.015	29.06	48.38	68.59	67.44	68.15
E-5	0.0171	0.915368	0.45145	71.1332	67.3446				0.015	32.2	47.9	73.58	75.01	72.93		0.015	28.68	48.33	65.63	69.69	63.8
CK1	0.5	0.372	0.1514
CK2	0.49993	0.35405	0.138019
CK3	0.5012	0.388069	0.155227

## Sheet: Dry matter digestibility date
DMD	2h	6h	12h	24h	48h
0	26.1972	27.9733	32.7157	32.9536	36.6763
0	30.1618	28.1913	29.7942	32.8843	33.89
0	28.18	28.08	31.27	32.93	35.3396
					33.1784
0.002	23.434	24.0723	28.0876	29.751	34.6356
0.002	24.6869	24.8251	27.2273	29.8957	36.0133
0.002	24.06	24.45	27.66	29.84	34.988
					35.9134
					35.6415
0.004	23.4984	24.2129	27.4932	30.8454	35.4142
0.004	26.6748	25.6119	29.1857	31.5223	34.0201
0.004	25.1	24.91	28.34	31.2	34.5334
0.004					34.2263
0.004					36.5902
0.006	26.7285	27.1695	29.0211	31.9017	34.1394
0.006	24.4381	28.0773	30.3142	32.6182	35.4746
0.006	25.6	27.64	29.68	32.26	33.7213
0.006					36.4034
0.006					34.7485
0.006					32.8896
0.008	25.2161	25.2327	28.3553	31.9464	33.8789
0.008	23.7452	24.5161	28.4803	30.7872	32.8198
0.008	24.5	24.89	28.42	31.37	34.3153
0.008					33.2297
0.008					37.3042
0.01	22.774	23.8796	27.6405	29.4271	36.0951
0.01	23.3658	26.5014	28.63	33.3367	34.8259
0.01	23.07	25.19	26.65	31.4	35.045
0.01					35.6615
0.015	24.0427	26.8882	29.9745	32.9531	34.0736
0.015	22.6187	24.9336	27.62	31.62	34.0617
0.015	23.33	25.91	32.32	34.28	33.5456
0.015					35.4223
0.015					33.8659

## Sheet: Crude protein digestibility
CPD		2h	6h	12h	24h	48h
	0	0.418	0.377	0.441	0.507	0.623
	0	0.422	0.365	0.41	0.512	0.618
	0	0.42	0.398	0.469	0.511	0.619
	0.002	0.475	0.459	0.472	0.508	0.689
	0.002	0.485	0.461	0.469	0.506	0.703
	0.002	0.47	0.46	0.469	0.516	0.678
	0.004	0.382	0.4	0.41	0.525	0.633
	0.004	0.378	0.412	0.435	0.502	0.63
	0.004	0.38	0.388	0.385	0.533	0.627
	0.006	0.433	0.459	0.454	0.502	0.623
	0.006	0.427	0.46	0.468	0.513	0.613
	0.006	0.429	0.46	0.428	0.485	0.624
	0.008	0.443	0.393	0.492	0.582	0.731
	0.008	0.437	0.384	0.486	0.569	0.756
	0.008	0.441	0.393	0.492	0.589	0.703
	0.01	0.508	0.443	0.485	0.656	0.866
	0.01	0.512	0.398	0.531	0.643	0.685
	0.01	0.506	0.479	0.484	0.681	0.759
	0.015	0.459	0.444	0.452	0.769	0.771
	0.015	0.461	0.463	0.549	0.683	0.694
	0.015	0.46	0.413	0.499	0.558	0.845
